# Supplementary material for: Snake venoms are integrated systems, but abundant venom proteins evolve more rapidly
Source: PubMed Central journal article supplement (PMC4552096; doi:10.1186/s12864-015-1832-6), 2015-08-28

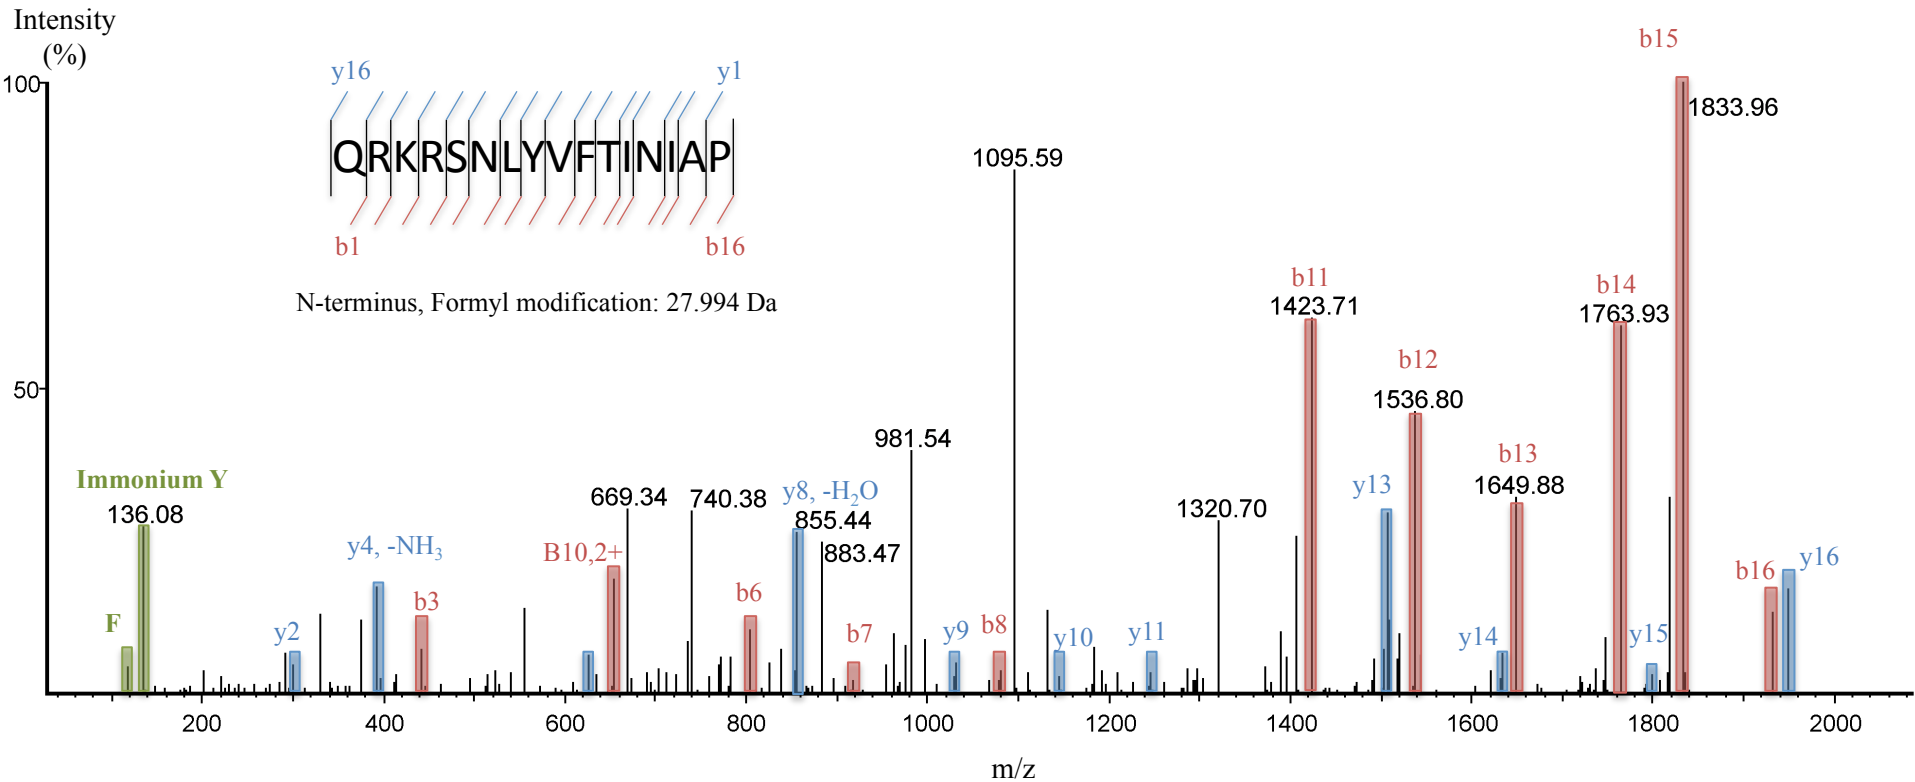

Supplement: 12864_2015_1832_MOESM7_ESM.pdf [file 12864_2015_1832_MOESM7_ESM.pdf]
