# Supplementary material for: Snake venoms are integrated systems, but abundant venom proteins evolve more rapidly
Source: PubMed Central journal article supplement (PMC4552096; doi:10.1186/s12864-015-1832-6), 2015-08-28
Supplement: 12864_2015_1832_MOESM8_ESM.pdf [file 12864_2015_1832_MOESM8_ESM.pdf]

Residue Abundance/Specimen

Pe\_comp47\_c0\_seq1

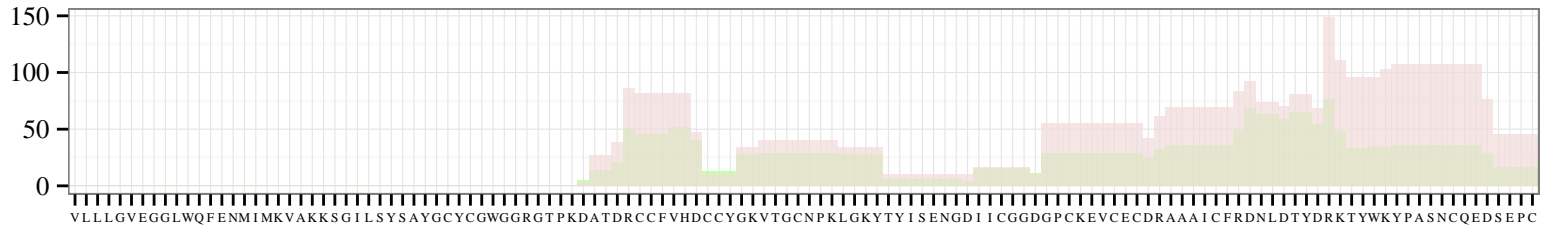

Pe  
Ph

Pf\_comp41\_c0\_seq1

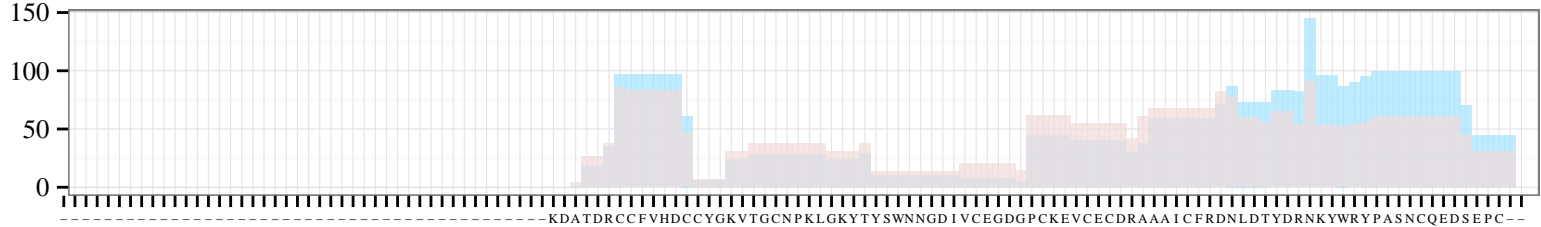

Pf  
Ph

Amino Acid Residues
